# Supplementary material
Source: Springer Nature journal article supplement (https://www.springermedizin.de/resource/supplementary/13014_2010_298_MOESM2_ESM.pdf/9633376)

**Volume (%)**

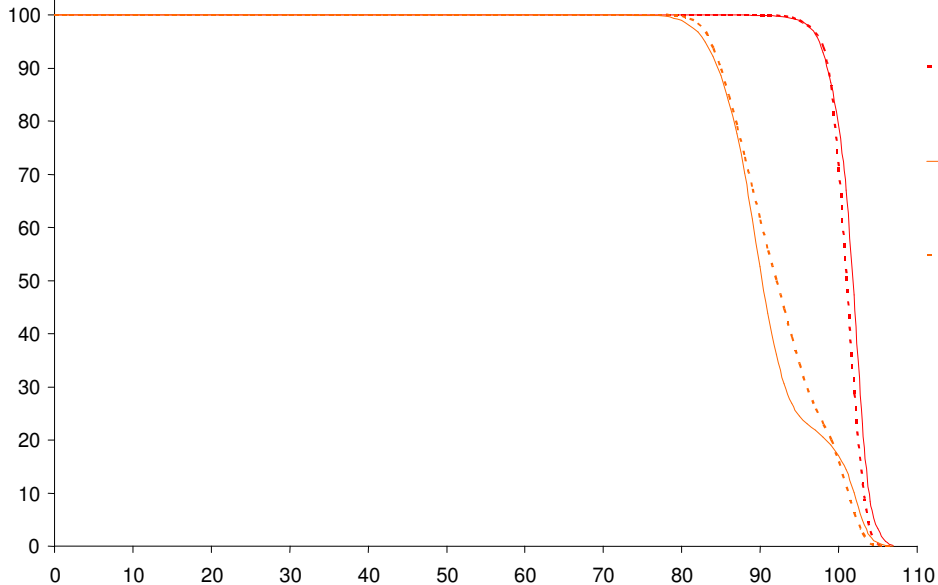

— RA PTV2

- - IMRT PTV2

— RA PTV1

- - IMRT PTV1

**Dose (%)**

Supplement: MOESM2 [file 9633376]
